# Supplementary material for: Peste Des Petits Ruminants in the Middle East: Epidemiological Situation and Status of Control and Eradication Activities after the First Phase of the PPR Global Eradication Program (2017–2021)
Source: MDPI journal article supplement (doi:10.3390/ani13071196), 2023-03-29
Supplement: s1 [file s1]

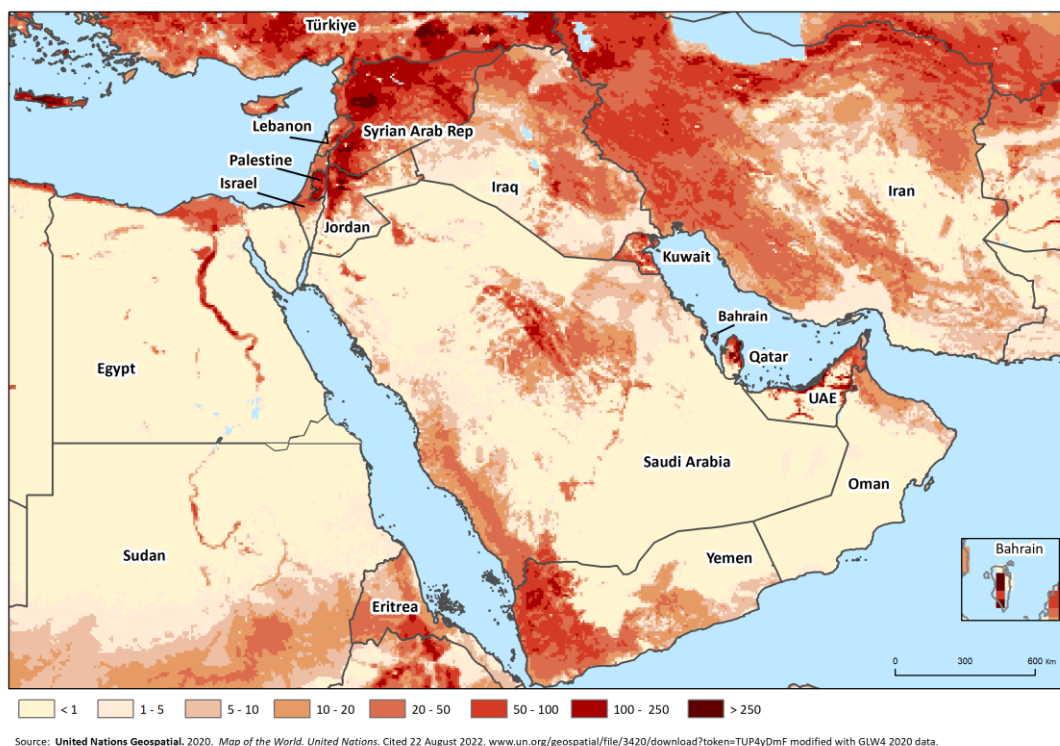

**Figure S1.** Map of the region showing the distribution of sheep adjusted to FAOSTAT population figures for 2020, with SR density (head per square km) indicated by the colored shading;.

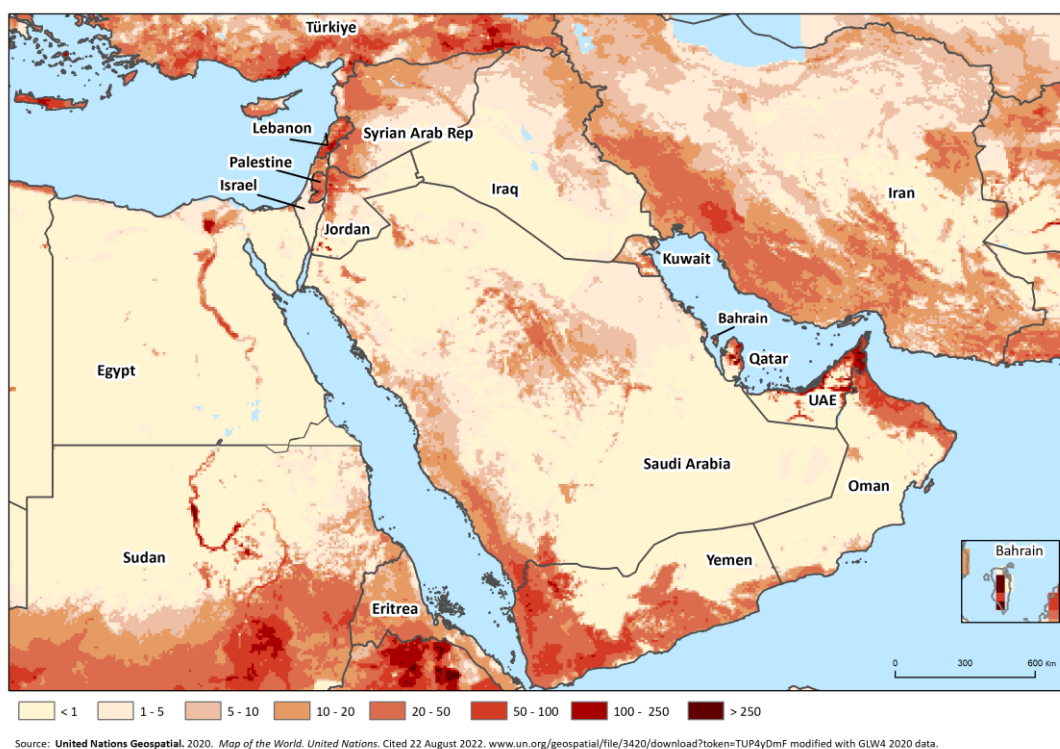

**Figure S2.** Map of the region showing the distribution of goats adjusted to FAOSTAT population figures for 2020, with SR density (head per square km) indicated by the colored shading;.

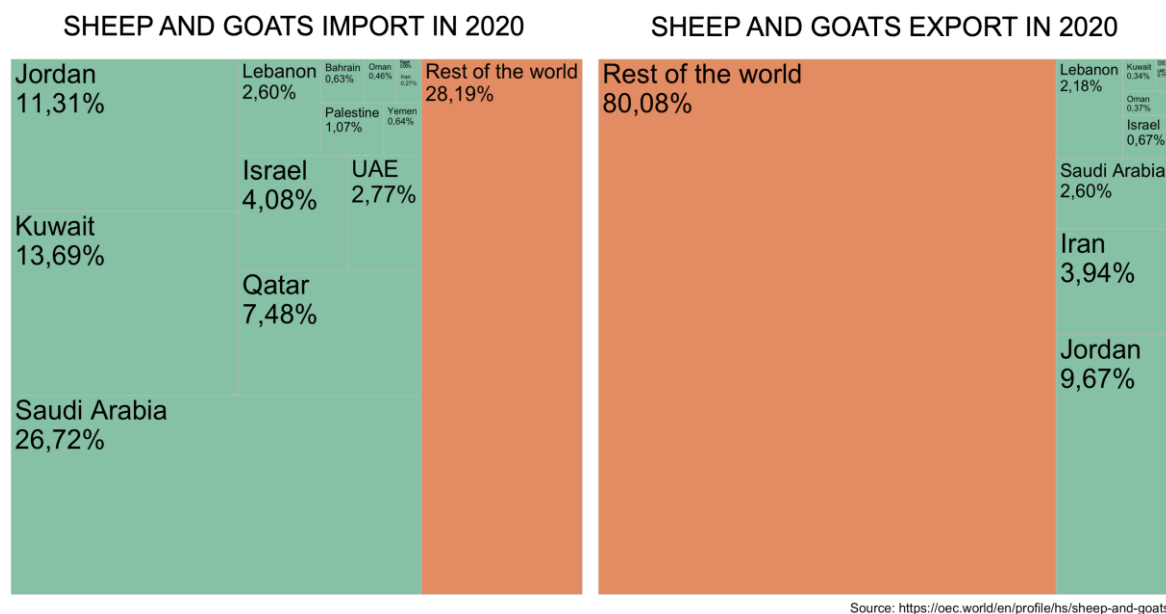

**Figure S3.** Share of global domestic SR (sheep and goats) imports and exports attributed to countries included in the present study, according to data gathered in 2020 by the Observatory of Economic Complexity [27];.

**Table S1.** Placement of Middle Eastern countries within the stepwise approach of the PPR GCES according to the latest self-assessment data.

| Country              | Last update | Stage 1<br>Assessment stage | Stage 2<br>Control Stage | Stage 3<br>Eradication stage | Stage 4<br>Post eradication stage |
|----------------------|-------------|-----------------------------|--------------------------|------------------------------|-----------------------------------|
| Bahrain              | 2022        |                             |                          |                              |                                   |
| Egypt                | 2021        |                             |                          |                              |                                   |
| Iran                 | 2021        |                             |                          |                              |                                   |
| Iraq                 | 2017        |                             |                          |                              |                                   |
| Israel               | 2021        |                             |                          |                              |                                   |
| Jordan               | 2022        |                             |                          |                              |                                   |
| Kuwait               | 2021        |                             |                          |                              |                                   |
| Lebanon              | 2021        |                             |                          |                              |                                   |
| Oman                 | 2022        |                             |                          |                              |                                   |
| Palestine            | 2022        |                             |                          |                              |                                   |
| Qatar                | 2022        |                             |                          |                              |                                   |
| Saudi Arabia         | 2022        |                             |                          |                              |                                   |
| Syrian Arab Republic | 2021        |                             |                          |                              |                                   |
| United Arab Emirates | 2022        |                             |                          |                              |                                   |
| Yemen                | 2022        |                             |                          |                              |                                   |
